# Supplementary material
Source: PubMed Central journal article supplement (PMC4127998)

## Supplementary Appendix

This appendix has been provided by the authors to give readers additional information about their work.

**Supplementary Table 1. Characteristics of subjects for medical check-up and patients for cancer surveillance.**

|                         | Medical Check-up          |                         | Cancer Surveillance       |                         |
|-------------------------|---------------------------|-------------------------|---------------------------|-------------------------|
|                         | (N=16699)                 |                         | (N=14389)                 |                         |
|                         | BAT negative<br>(N=16435) | BAT positive<br>(N=264) | BAT negative<br>(N=14243) | BAT positive<br>(N=146) |
| Female-no. (%)          | 5485(33.37)               | 179(67.80)              | 5906(40.81)               | 94(64.38)               |
| Age-years               | 47.78±9.45                | 40.00±8.17              | 55.02±14.12               | 43.70±13.38             |
| Weight(kg)              | 68.78±12.51               | 58.47±10.13             | 63.10±11.56               | 58.20±9.10              |
| Outdoor temperature(°C) | 18.01±9.81                | 12.22±10.96             | 17.36±9.32                | 12.99±10.19             |

Note: There were 16 missing values for weight in medical check-up subjects and 17 missing values for weight in cancer surveillance patients.

**Supplementary Table 2. Geographic coordinates and average monthly temperature of four locations**

|                        | Shanghai | Boston  | Sherbrooke | Nottingham |
|------------------------|----------|---------|------------|------------|
| Geographic coordinates | 31°12'N  | 42°21'N | 45°24'N    | 52°58'N    |

|                            |        |    |    |     |    |
|----------------------------|--------|----|----|-----|----|
| Average<br>temperature(°C) | Annual | 16 | 11 | 5   | 9  |
|                            | Jan    | 4  | -1 | -9  | 2  |
|                            | Feb    | 5  | -1 | -10 | 3  |
|                            | Mar    | 8  | 3  | -3  | 5  |
|                            | Apr    | 15 | 9  | 4   | 7  |
|                            | May    | 20 | 15 | 11  | 11 |
|                            | June   | 23 | 20 | 16  | 14 |
|                            | July   | 28 | 24 | 19  | 16 |
|                            | August | 27 | 22 | 17  | 15 |
|                            | Sep.   | 23 | 19 | 13  | 13 |
|                            | Oct.   | 18 | 13 | 7   | 9  |
|                            | Nov.   | 12 | 7  | /   | 6  |
|                            | Dec.   | 6  | 1  | -6  | 3  |

Note:From [www.weatherbase.com](http://www.weatherbase.com)

**Supplementary Figure 1. The evaluation of detectable BAT and fatty liver via  $^{18}\text{F}$ -FDG PET/CT.**

Figure 1A show the coronal, sagittal, transaxial and 3D pictures of CT, PET and fused imaging of a subject with active BAT. The intense yellow regions in the PET/CT images correspond to the cervical, supraclavicular, mediastinal BAT depots. Figure 1B and 1C show transaxial liver images of fused PET/CT. The values were CT attenuation measured as described in Methods. Figure 1B was the image from a subject without fatty liver while Figure 1C from a subject with fatty liver.

**Supplementary Figure 2. Correlation between the Prevalence of Active Brown Adipose Tissue and Temperature.**

The prevalence of active brown adipose tissue is plotted against the mean monthly outdoor temperature in Shanghai in logistic regression. In both cancer surveillance group ( $r = -0.227$ ,

P=0.196) and medical check-up group ( $r = -0.759$ ,  $P < 0.0001$ ), the probability of BAT decreased with increasing outdoor temperature.

Supplementary Figure 1

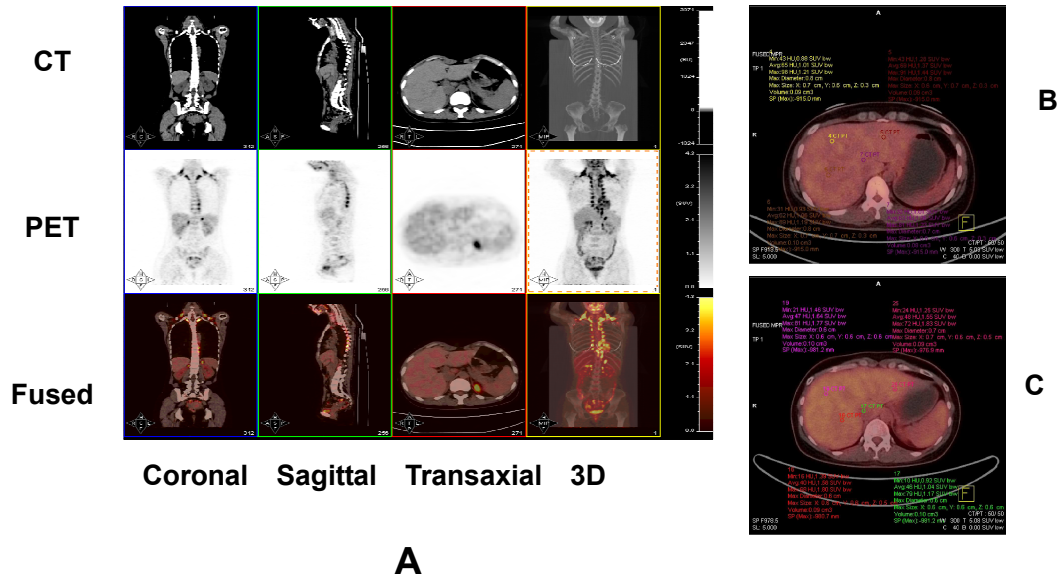

Supplementary Figure 2

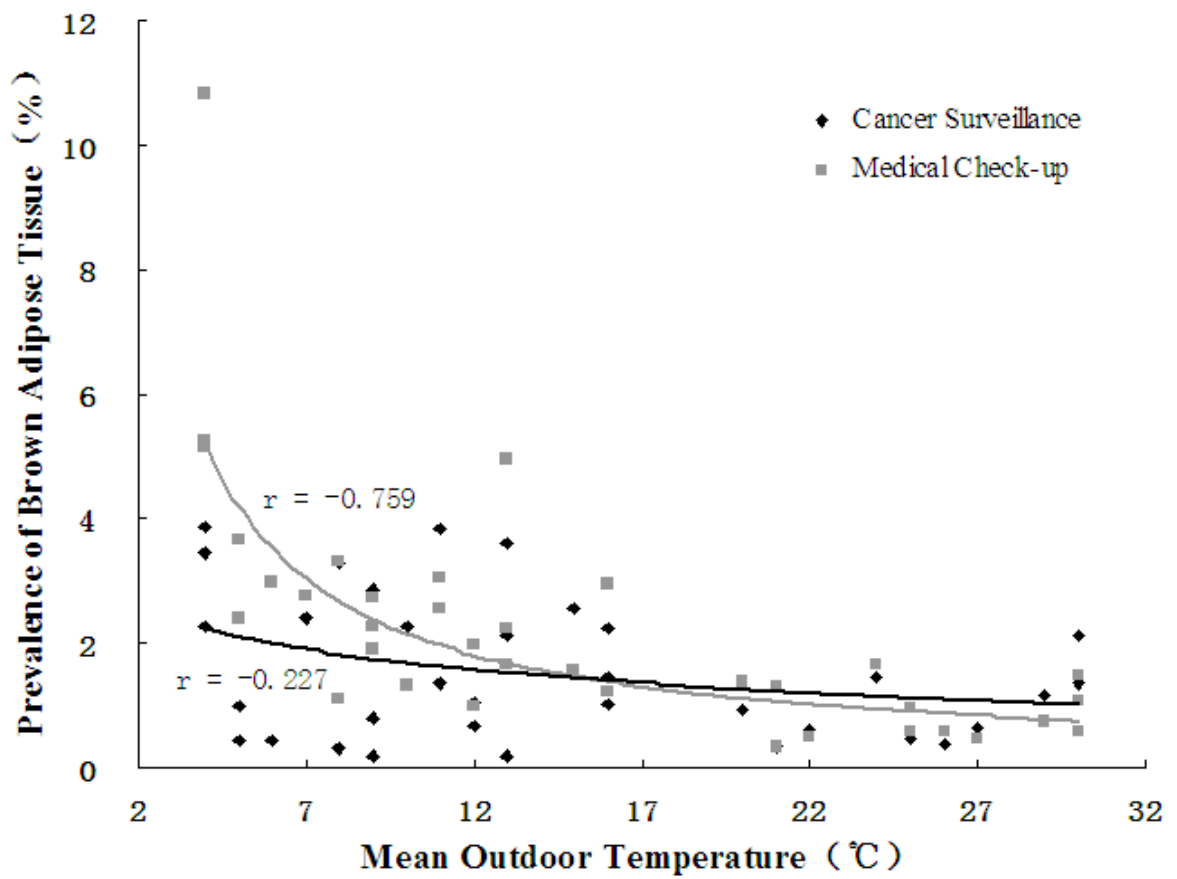

Supplement: NIHMS609361-supplement-Supplementary_data.pdf [file NIHMS609361-supplement-Supplementary_data.pdf]
